# Supplementary material for: Facile synthesis of well-ordered manganese oxide nanosheet arrays on carbon cloth for high-performance supercapacitors
Source: Royal Society of Chemistry journal article supplement (doi:10.1039/c4ta01238k), 2014-01-01
Supplement: c4ta01238k1.pdf [file c4ta01238k1.pdf]

Electronic Supplementary Material

## Facile synthesis of well-ordered manganese oxide nanosheet arrays on carbon cloth for high-capacitance supercapacitors

Di Guo, Xinzhi Yu, Wei Shi, Yazi Luo, Qihong Li\*, Taihong Wang\*

*Key Laboratory for Micro-Nano Optoelectronic Devices of Ministry of Education, and State Key Laboratory for Chemo/Biosensing and Chemometrics, Hunan University, Changsha, 410082, P. R. China.*

*\*E-mail: [liqihong2004@hotmail.com](mailto:liqihong2004@hotmail.com) (Q. H. Li); [thwang@iphy.ac.cn](mailto:thwang@iphy.ac.cn) (T. H. Wang);*

*Tel.: +86 0731 88664019; Fax: +86 0731 88822137.*

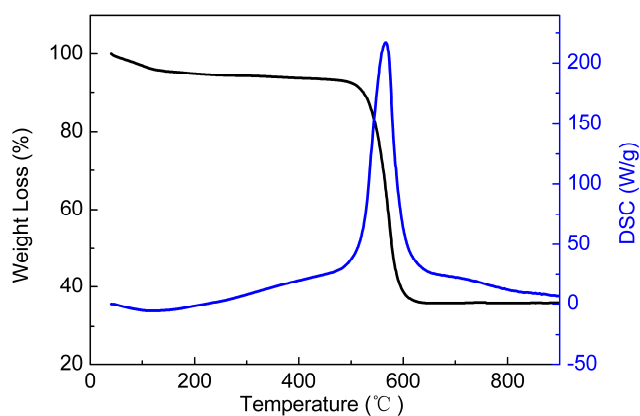

**Fig. S1** TGA-DSC curves for the MnO<sub>2</sub> NSAs.

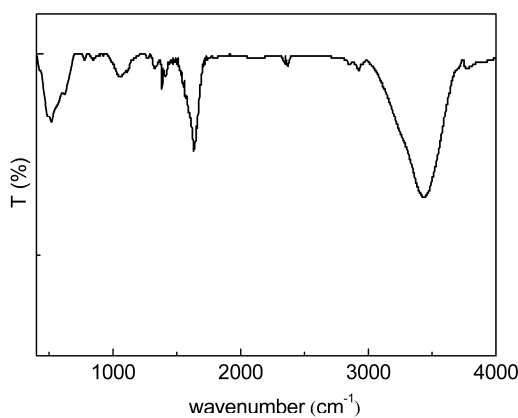

**Fig. S2** FT-IR spectra of as-synthesized MnO<sub>2</sub> NSAs.

TGA-DSC curves have further demonstrated to quantify the carbon amount in the material (Fig. S2). The total weight loss of sample is 64% and the weight becomes stable above 600°C. The FT-IR spectrum is presented in Fig. S2. Two absorption bands observed at 600 and 480 cm<sup>-1</sup> are corresponded to the characteristic stretching collision of O-Mn-O, which demonstrated the presence of the MnO<sub>2</sub> in the sample. The peaks detected at 1100 and 1,652 cm<sup>-1</sup> symbolized the stretching collision of C-O and C=O from the surface of carbon cloth, respectively. The typical broad absorption in the wavelength ranges (3200-3500 cm<sup>-1</sup>) are allocated hydroxyl absorption of H-O-H.

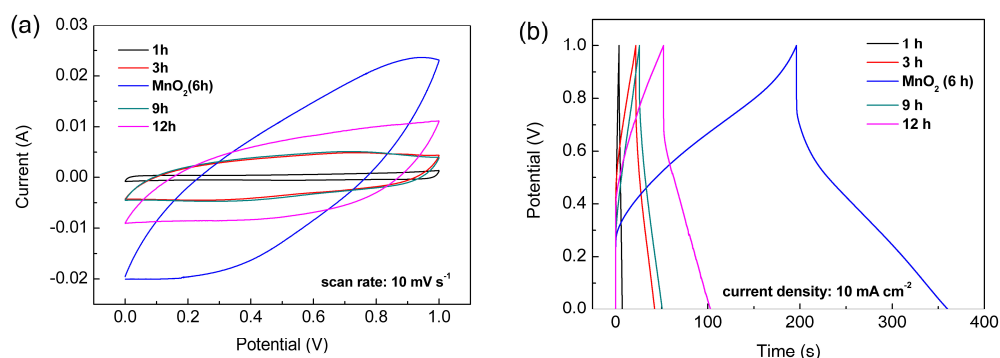

**Fig. S3** (a) Electrochemical performances of MnO<sub>2</sub> obtained at 180°C at different times: 1 h, 3 h, 6 h, 9 h and 12 h. (a) CV curves at 10 mV s<sup>-1</sup>. (b) Galvanostatic charge/discharge curves at a current density of 10 mA cm<sup>-2</sup>.

| Electrode materials                                      | Specific capacitance    | Current density/<br>Scan rate                    | Reference |
|----------------------------------------------------------|-------------------------|--------------------------------------------------|-----------|
| whisker-like MnO <sub>2</sub> arrays                     | 274.1 F g <sup>-1</sup> | 0.1 A g <sup>-1</sup>                            | 30        |
| three-dimensionally ordered macroporous MnO <sub>2</sub> | 765 F g <sup>-1</sup>   | 2 mV s <sup>-1</sup>                             | 31        |
| α-MnO <sub>2</sub> nanorods                              | 245 F g <sup>-1</sup>   | 1 A g <sup>-1</sup>                              | 32        |
| amorphous nanostructured MnO <sub>2</sub>                | 250 F g <sup>-1</sup>   | 0.5 mA cm <sup>-2</sup> (0.8 A g <sup>-1</sup> ) | 34        |
| MnO <sub>2</sub> nanosheet                               | 425 F g <sup>-1</sup>   | 0.13 mA cm <sup>-2</sup>                         | 40        |
| polyaniline-MnO <sub>2</sub> coaxial nanofiber           | 383 F g <sup>-1</sup>   | 0.5 A g <sup>-1</sup>                            | 43        |
| MnO <sub>2</sub> -coated carbon nanotubes                | 193 F g <sup>-1</sup>   | 0.2 A g <sup>-1</sup>                            | 44        |
| graphene and nanostructured MnO <sub>2</sub> composite   | 245 F g <sup>-1</sup>   | 1 mA cm <sup>-2</sup>                            | 45        |
| MnO <sub>2</sub> nanosheet arrays grown on carbon cloth  | 1.67 F cm <sup>-2</sup> | 10 mA cm <sup>-2</sup>                           | our work  |

**Table 1** Summarization of the supercapacitor performance of different MnO<sub>2</sub> nanomaterials.
